# Supplementary material for: Mechanical response of bilayer silicene nanoribbons under uniaxial tension
Source: Royal Society of Chemistry journal article supplement (doi:10.1039/c7ra12482a), 2018-01-01
Supplement: c7ra12482a1.pdf [file c7ra12482a1.pdf]

Electronic Supplementary Information for RSC Advances

This journal is ©The Royal Society of Chemistry 2018

Electronic Supplementary Information (ESI)

## **Mechanical response of bilayer silicene nanoribbons under uniaxial tension**

M. R. Chávez Castillo,<sup>ab</sup> M. A. Rodríguez-Meza,<sup>b</sup> and L. Meza-Montes<sup>\*a</sup>

<sup>a</sup> Instituto de Física, Benemérita Universidad Autónoma de Puebla, Apdo. Postal J-48, 72570, Puebla, Pue., México

<sup>b</sup> Instituto Nacional de Investigaciones Nucleares, Apdo. Postal 18-1027, 11801, México, D.F., México

\* Correspondence author E-mail: [lilia@ifuap.buap.mx](mailto:lilia@ifuap.buap.mx)

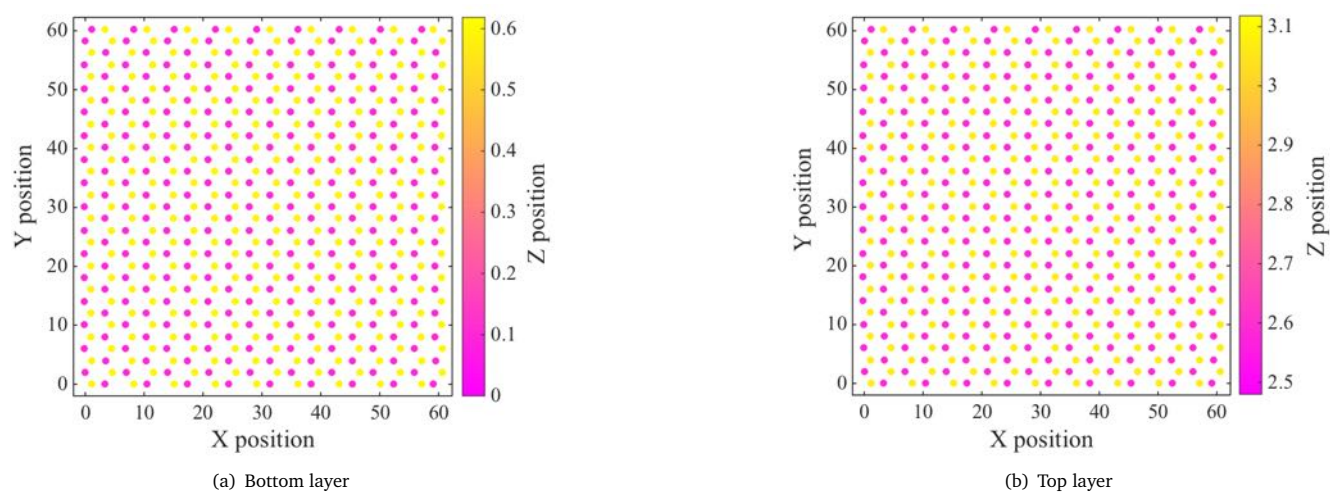

**Fig. S1** Distribution of atomic relaxed positions for B-SNR of 60 Å side (ach3). Interlayer distance  $z=2.48$  Å.

Fig. S1 shows atoms positions after relaxation. Positions X, Y and Z are in Å. Average buckling ( $h_{avg}$ ) is defined as  $|z_{avg}^o - z_{avg}^i|$ , where  $z_{avg}^o$  and  $z_{avg}^i$  are the average z-positions of the outer and inner atoms of the layers, respectively.  $h_{avg}$  obtained for the ach3 B-SNRs is around 0.50 Å. All B-SNRs sizes considered in this study show similar results.

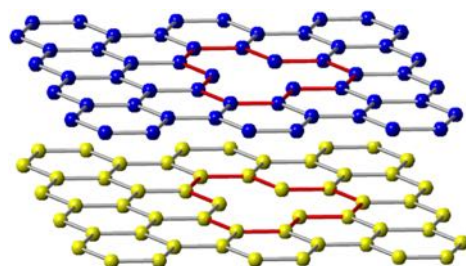

**Fig. S2** Schematic representation of a central mono-vacancy defect in both layers of the B-SNRs (mv12 configuration). Yellow balls represent atoms in the 1st layer and blue ones the atoms in the 2nd layer. Red bonds are defined in order to trace the mono-vacancy defect.

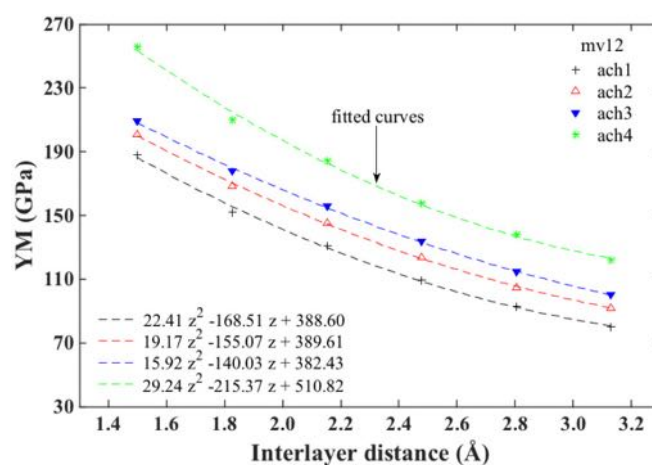

**Fig. S3** Young's modulus of mv12 defective B-SNRs configuration vs interlayer distance. ach and number label indicate the chirality and the size of the ribbon, respectively (see Table 1). Fitted curves represent the non-linear behaviour of the Young's modulus.

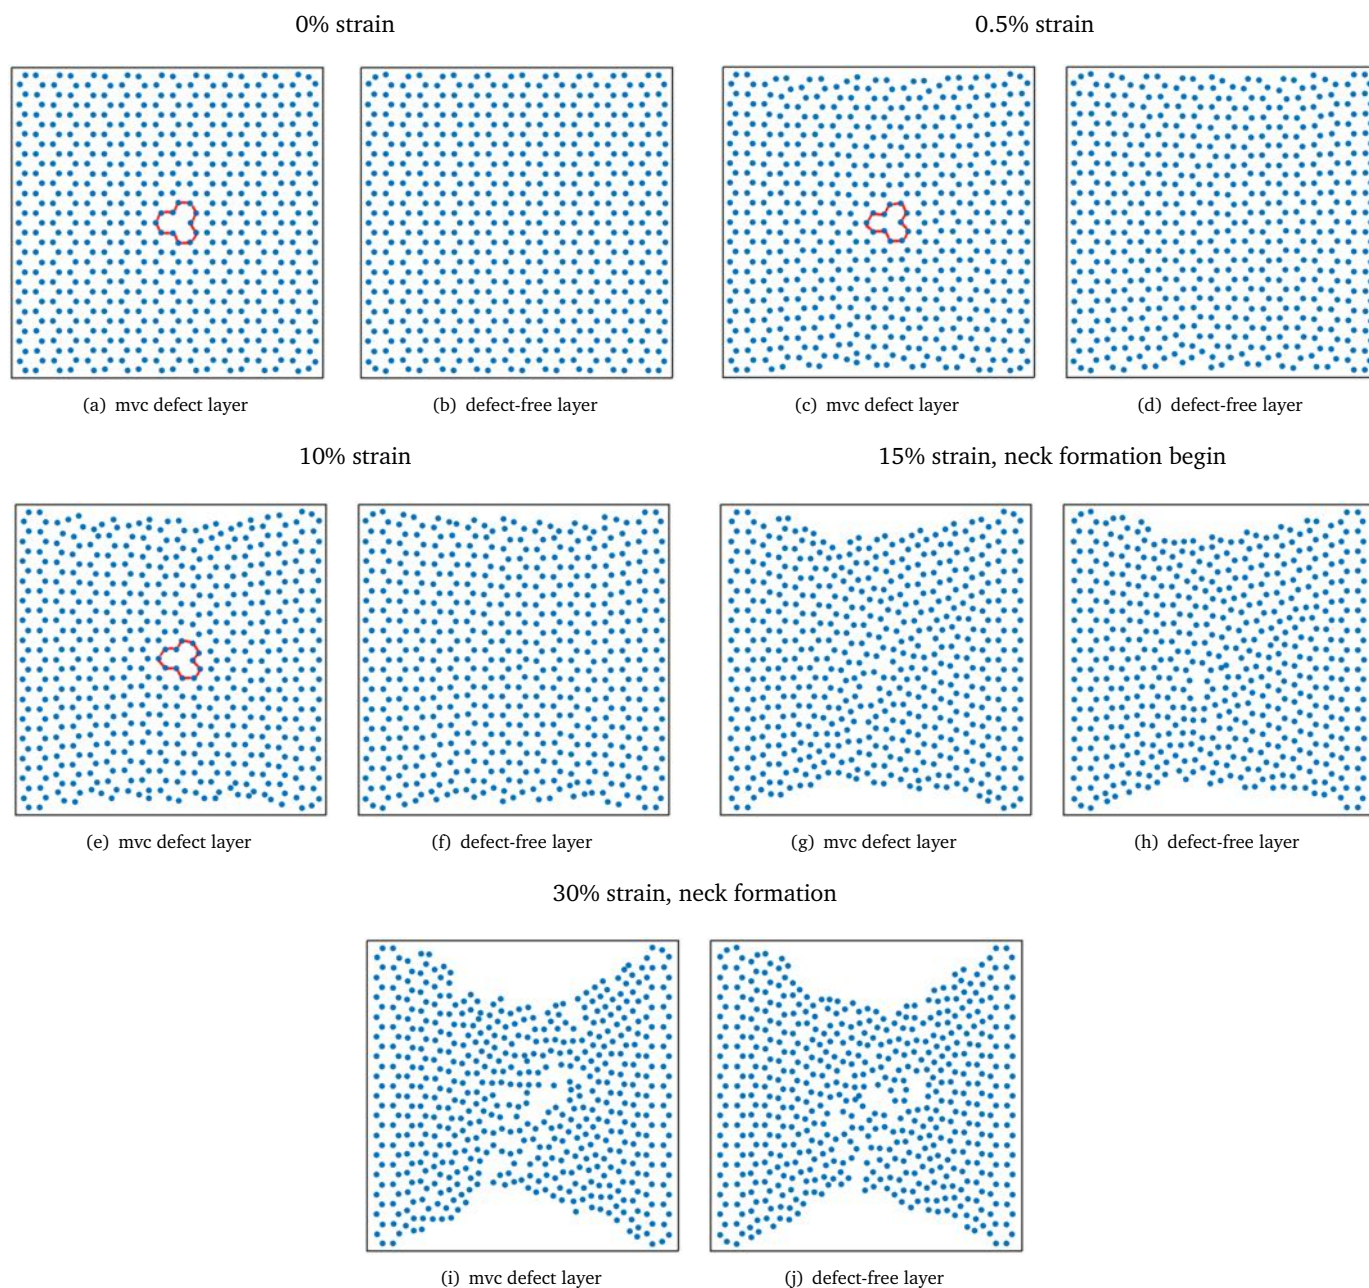

**Fig. S4** Atomic configurations for the ach3 B-SNR shown in Fig. 5 at different strains. Interlayer distance  $z=2.48$  Å. Figures on the left side correspond to the first layer and those on the right correspond to the second layer. Note that the box has been scaled along the strain direction.
